# Supplementary material for: Lysine-PEGylated Cytochrome C with Enhanced Shelf-Life Stability
Source: MDPI journal article supplement (doi:10.3390/bios12020094), 2022-02-04
Supplement: s1 [file s1]

## Lysine-PEGylated Cytochrome c with Enhanced Shelf-Life Stability

João H. P. M. Santos<sup>1,2\*</sup>, Valker A. Feitosa<sup>1,2</sup>, Giovanna P. Meneguetti<sup>1,2</sup>, Gustavo Carretero<sup>3</sup>, João A. P. Coutinho<sup>4</sup>, Sónia P. M. Ventura<sup>4</sup> and Carlota O. Rangel-Yagui<sup>1\*</sup>

<sup>1</sup> Department of Biochemical and Pharmaceutical Technology, School of Pharmaceutical Science, University of São Paulo, São Paulo 05508-000, Brazil; valker@usp.br (V.A.F.); gimeneguetti@ipt.br (G.P.M.)

<sup>2</sup> Bionanomanufacturing Center, Institute for Technological Research, São Paulo 05508-901, Brazil

<sup>3</sup> Department of Biochemistry, Institute of Chemistry, University of São Paulo, São Paulo 05508-000, Brazil; gustavo.carretero@usp.br

<sup>4</sup> CICECO – Aveiro Institute of Materials, Department of Chemistry, University of Aveiro, 3810-193 Aveiro, Portugal; jcoutinho@ua.pt (J.A.P.C.); spventura@ua.pt (S.P.M.V.)

\* Correspondence: jhsantos@usp.br (J.H.P.M.S.); corangel@usp.br (C.O.R.Y.)

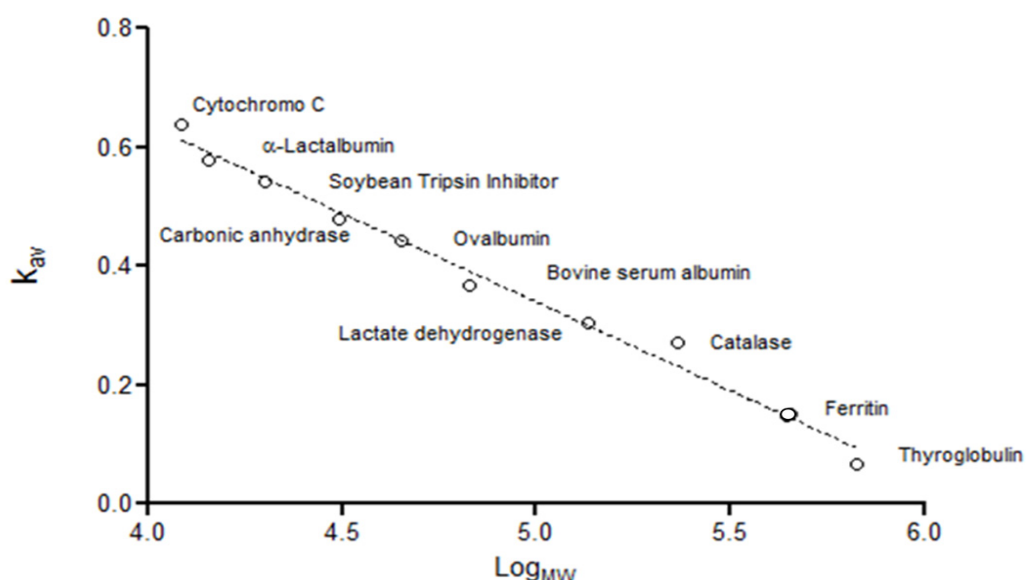

**Figure S1.** Calibration curve of size exclusion chromatography (SEC) using a Superdex 200 Increase 10/300 GL column (crosslinked agarose-dextran resin, Cytiva) in an AKTA™ purifier system (Cytiva). Data obtained by plotting the  $K_{av}$  value of each protein marker and the logarithms of their molecular weights (MW), namely: thyroglobulin 669 kDa, ferritin 450 kDa, catalase 232 kDa, lactate dehydrogenase 136.7 kDa, bovine serum albumin 67 kDa, ovalbumin 45 kDa, carbonic anhydrase 31 kDa, soybean trypsin inhibitor 20.1 kDa,  $\alpha$ -lactalbumin 14.4 kDa and cytochrome c 12.2 kDa.

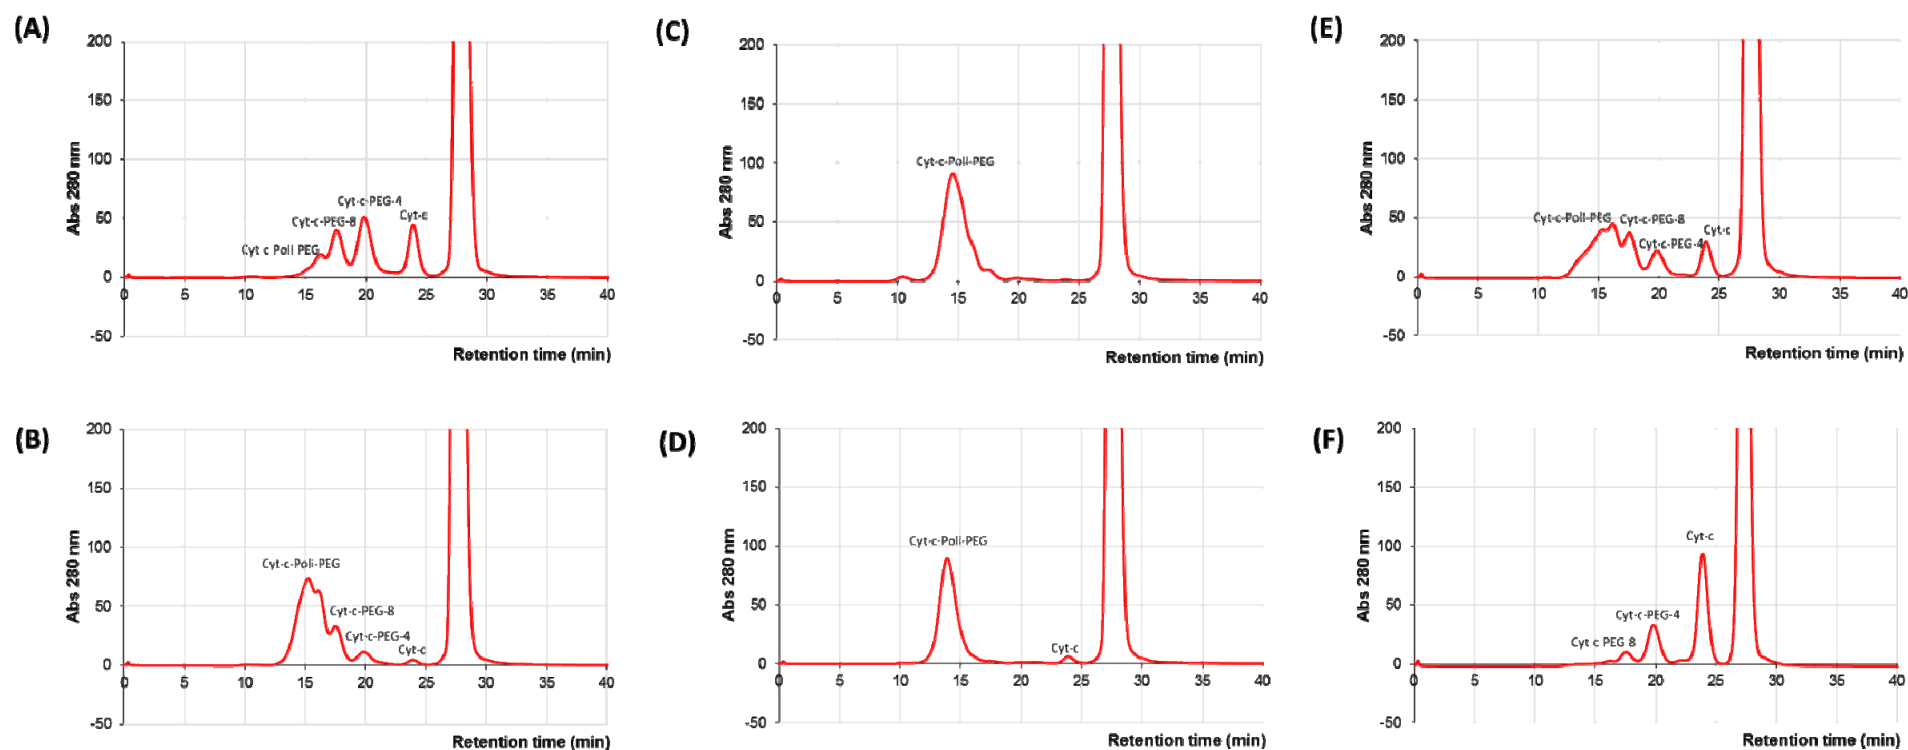

**Figure S2.** Effect of pH on cytochrome c (Cyt-c) PEGylation yield. Chromatogram of the PEGylation reaction mixture for the Cyt-c PEGylation in 0.1 M of potassium phosphate buffer at different pH values: 7 (A), 8 (B), 9 (C), 10 (D), 11 (E), and 12 (F). Reaction conditions: molar ratio 1:25 (protein:mPEG-NHS, 5 kDa), room temperature, 30 min. The peaks correspond to both Cyt-c PEGylated forms and unreacted protein.

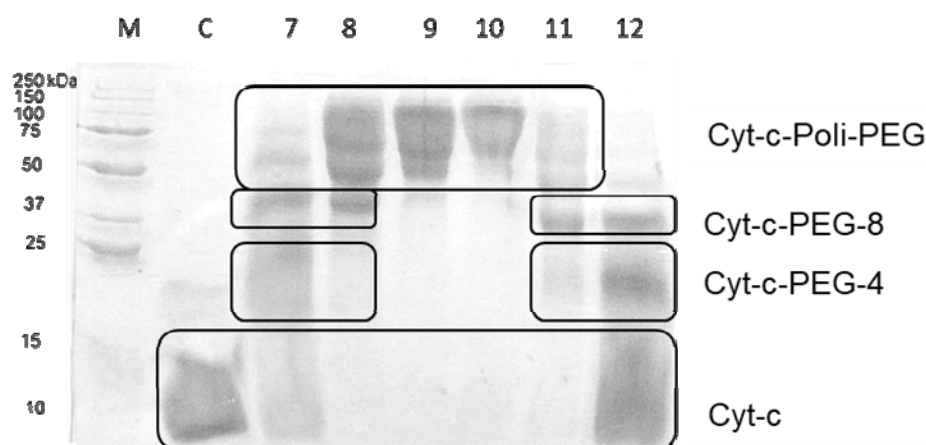

**Figure S3.** SDS-PAGE for the conjugation of mPEG-NHS to cytochrome c (Cyt-c) at different pHs. Lane 1: molecular weight marker, Lane 2: cytochrome c, Lane 3: pH 7, Lane 4: pH 8, Lane 5: pH 9; Lane 6: pH 10, Lane 7: pH 11, Lane 8: pH 12. The PEGylation reaction was performed in 0.1 M potassium phosphate buffer, 1:25 molar proportion (Cyt-c:mPEG-NHS, 5 kDa), at room temperature, for 30 minutes, and with a constant stirring of 400 rpm.

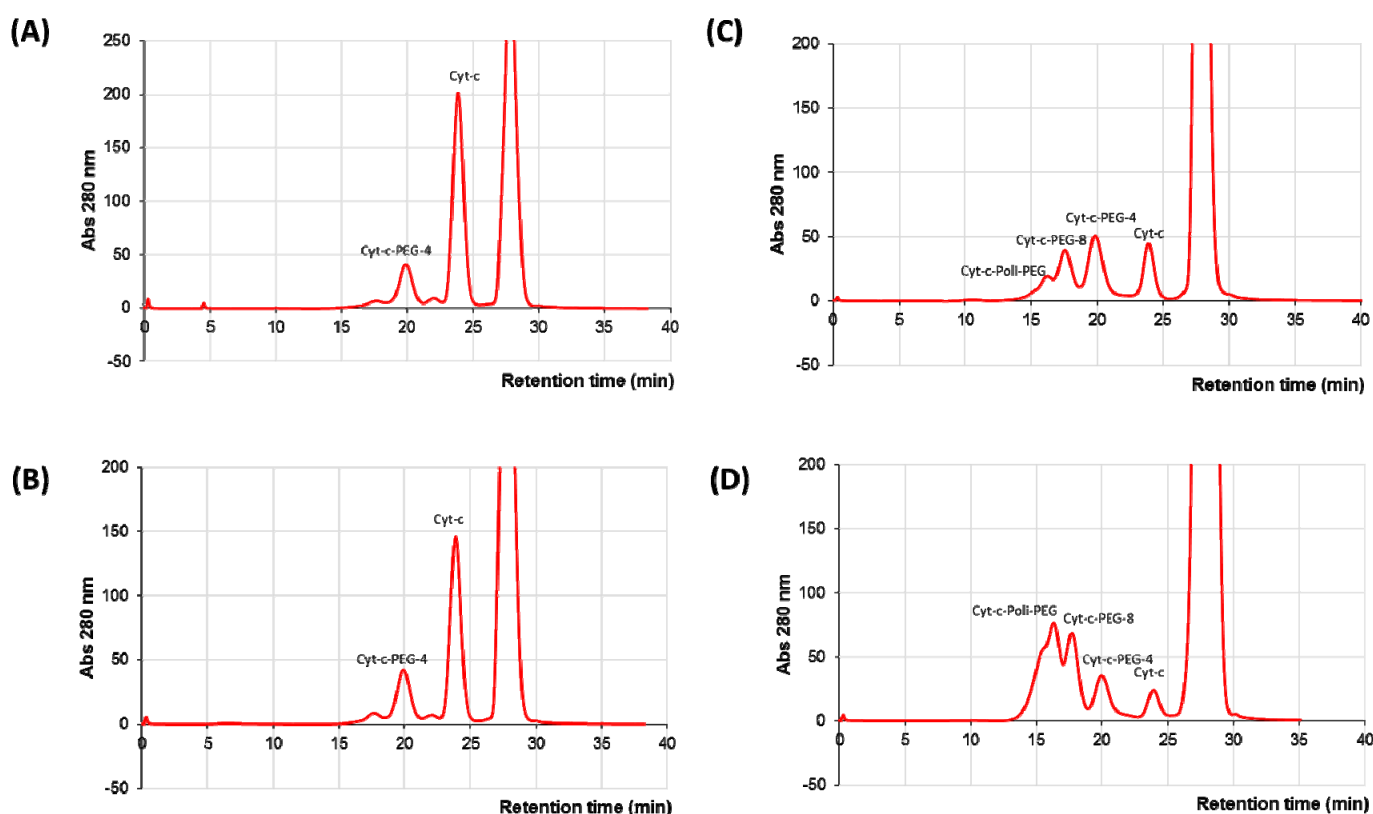

**Figure S4.** Effect of molar ratio (protein:mPEG-NHS) on cytochrome c (Cyt-c) PEGylation yield. Chromatogram of the PEGylation reaction mixture from a PEGylation reaction in 0.1 M phosphate buffer (pH =7) at different molar ratios (protein:mPEG-NHS, 5 kDa): 1:5 (A), 1:10 (B), 1:25 (C), and 1:35 (D), at room temperature for 30 minutes. The peaks correspond to both Cyt-c PEGylated forms and unreacted protein.

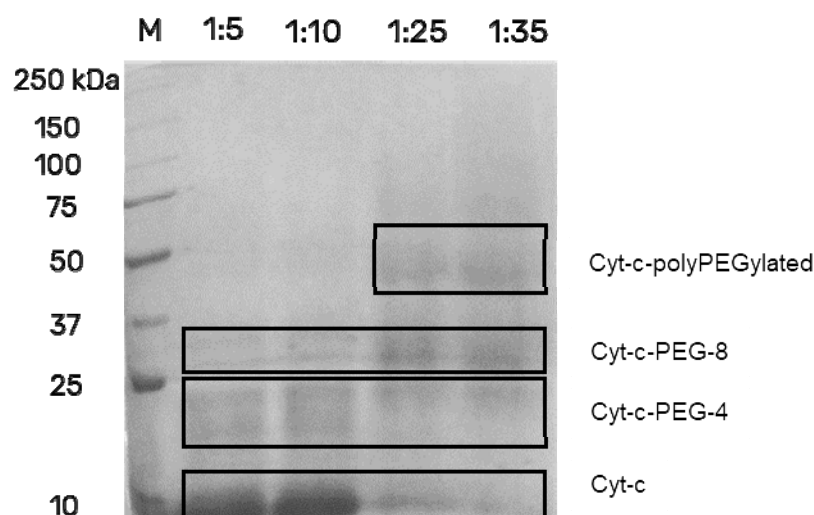

**Figure S5.** SDS-PAGE for the conjugation of mPEG-NHS with cytochrome c (Cyt-c) at different molar ratios (protein:mPEG-NHS). Lane 1: molecular weight marker, Lane 2: 1:5, Lane 3: 1:10, Lane 4: 1:25, Lane 5: 1:35. The PEGylation reaction was performed in 0.1 M potassium phosphate buffer (pH 7), at room temperature, for 30 minutes, and with a constant stirring of 400 rpm.

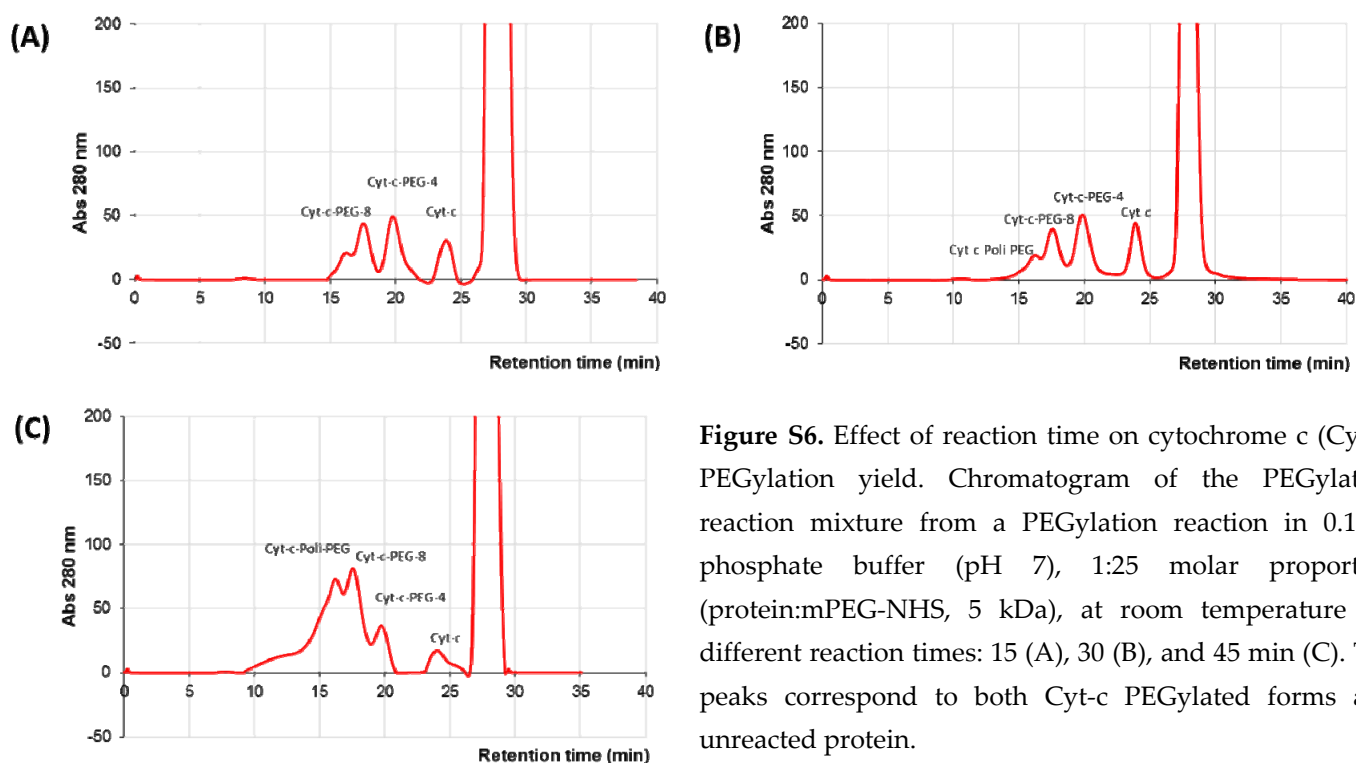

**Figure S6.** Effect of reaction time on cytochrome c (Cyt-c) PEGylation yield. Chromatogram of the PEGylation reaction mixture from a PEGylation reaction in 0.1 M phosphate buffer (pH 7), 1:25 molar proportion (protein:mPEG-NHS, 5 kDa), at room temperature for different reaction times: 15 (A), 30 (B), and 45 min (C). The peaks correspond to both Cyt-c PEGylated forms and unreacted protein.

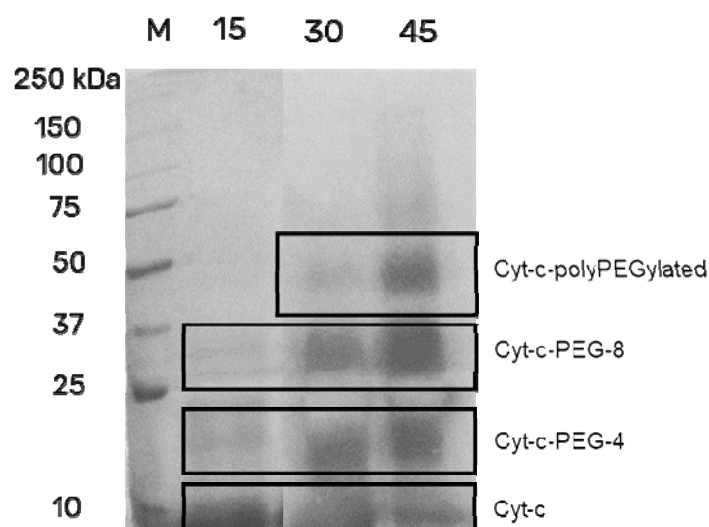

**Figure S7.** SDS-PAGE for the conjugation of mPEG-NHS with cytochrome c (Cyt-c) for different reaction times. Lane 1: molecular weight marker, Lane 2: 15 min, Lane 3: 30 min, Lane 4: 45 min. The PEGylation reaction was performed in 0.1 M potassium phosphate buffer (pH 7), 1:25 molar proportion (protein:mPEG-NHS, 5 kDa), at room temperature, and with a constant stirring of 400 rpm.

**Table S1.** Half-life ( $t_{1/2}$ ) and long-term residual activity of native and PEGylated forms of cytochrome c (Cyt-c) stored in phosphate buffer at 4 °C and 25 °C.

| Cyt-c form  | Half-life* (days) |       | Residual activity (%) on day |       |
|-------------|-------------------|-------|------------------------------|-------|
|             | 4 °C              | 25 °C | 60                           |       |
|             |                   |       | 4 °C                         | 25 °C |
| Native      | ~44               | ~24   | 42.8                         | 27.3  |
| Cyt-c-PEG-4 | >60               | >60   | 62.2                         | 53.4  |
| Cyt-c-PEG-8 | >60               | >60   | 80.4                         | 57.3  |

\*Half-life (i.e. the time taken for the Cyt-c residual activity to be reduced by 50% of the initial) was estimated from data presented in Figure 6.
